# Supplementary material for: Electromagnetic shielding performance of polyaniline-nanorod/graphene-nanoflake hybrid films in the S- and X-bands
Source: Royal Society of Chemistry journal article supplement (doi:10.1039/d2nj05284a), 2022-12-21
Supplement: d2nj05284a1.pdf [file d2nj05284a1.pdf]

## Supplementary Data

### Electromagnetic shielding performance of polyaniline-nanorod/graphene-nanoflake hybrid films in the S- and X- bands

Ranjini R. Mohan<sup>1</sup>, Anandhu Thejas Prasannakumar<sup>2</sup>, Joseph John<sup>3</sup>, Sreekanth J. Varma<sup>2\*</sup>, S. Jayalekshmi<sup>1,4\*</sup>

<sup>1</sup>Division for Research in Advanced Materials, Department of Physics, Cochin University of Science and Technology, Kochi-682022, Kerala, India

<sup>2</sup>Materials for Energy Storage and Optoelectronic Devices Group, Department of Physics, Sanatana Dharma College, University of Kerala, Alappuzha-688003, Kerala, India

<sup>3</sup>Post Graduate Department of Physics, Aquinas College, Edacochin, Kerala, India

<sup>4</sup>Centre of Excellence in Advanced Materials, Cochin University of Science and Technology, Kochi-682022, Kerala, India

\*Corresponding authors:

S. Jayalekshmi E-mail [jayalekshmi@cusat.ac.in](mailto:jayalekshmi@cusat.ac.in), Phone: +91-854775934

Sreekanth J. Varma E-mail [sjv@sdcollege.in](mailto:sjv@sdcollege.in), Phone: +91-9496179724

**ORCID ID:** RR Mohan 0000-0001-9631-188X; Anandhu T.P 0000-0002-0795-3993; SJ Varma 0000-0002-4217-1495

### Synthesis of PANI-graphene hybrids

Aniline monomer (4.5 mL) and 1M HCl (50 mL) is mixed with chloroform in the ratio 1:2 (v:v). 1M ammonium persulphate (11.2 mL) was added dropwise to this mixture while stirring. It is stirred for 6 hours in an ice bath and the green PANI dispersion is filtered and washed using distilled water and acetone to remove oligomers and excess acid. The sample is then dried at 50 °C in a vacuum oven overnight. The doped, green powder of PANI thus obtained is then finely ground and deprotonated using 1M ammonia solution for the preparation of the hybrid samples.

**Scanning Electron Microscopy Analysis**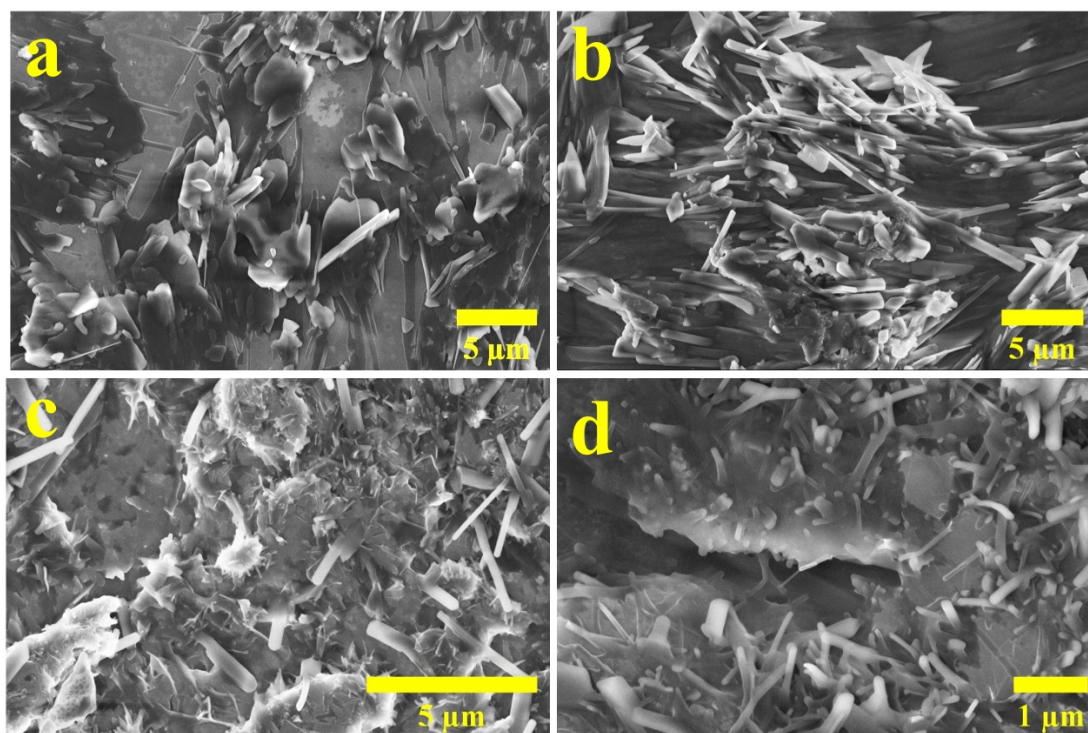

**Figure S1.** SEM micrographs of PANI-nanorod/graphene-nanoflake hybrid films

## Absorption, Reflection and Transmission Coefficients

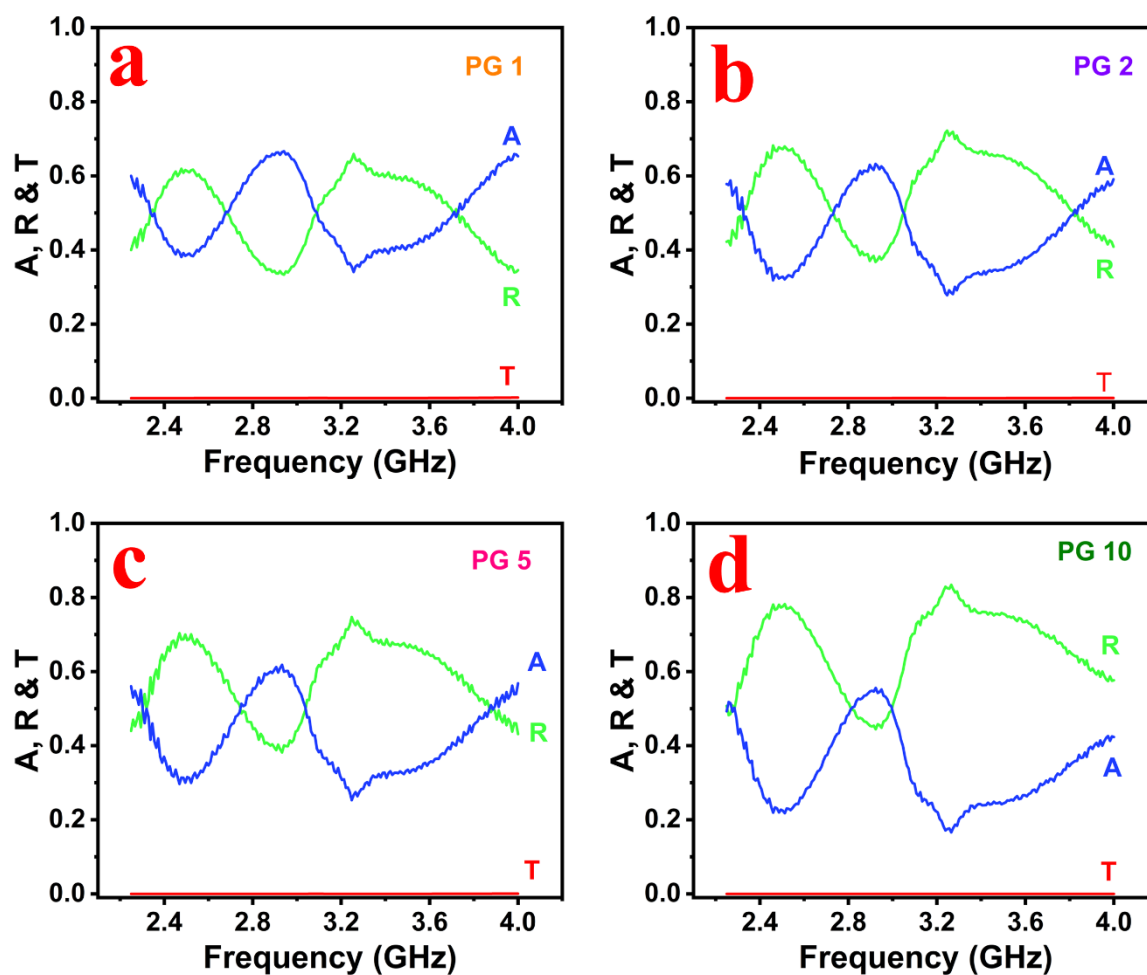

**Figure S2.** Absorption, reflection and transmission coefficients of the PANI-nanorod/graphene-nanoflake hybrid films in the S-band

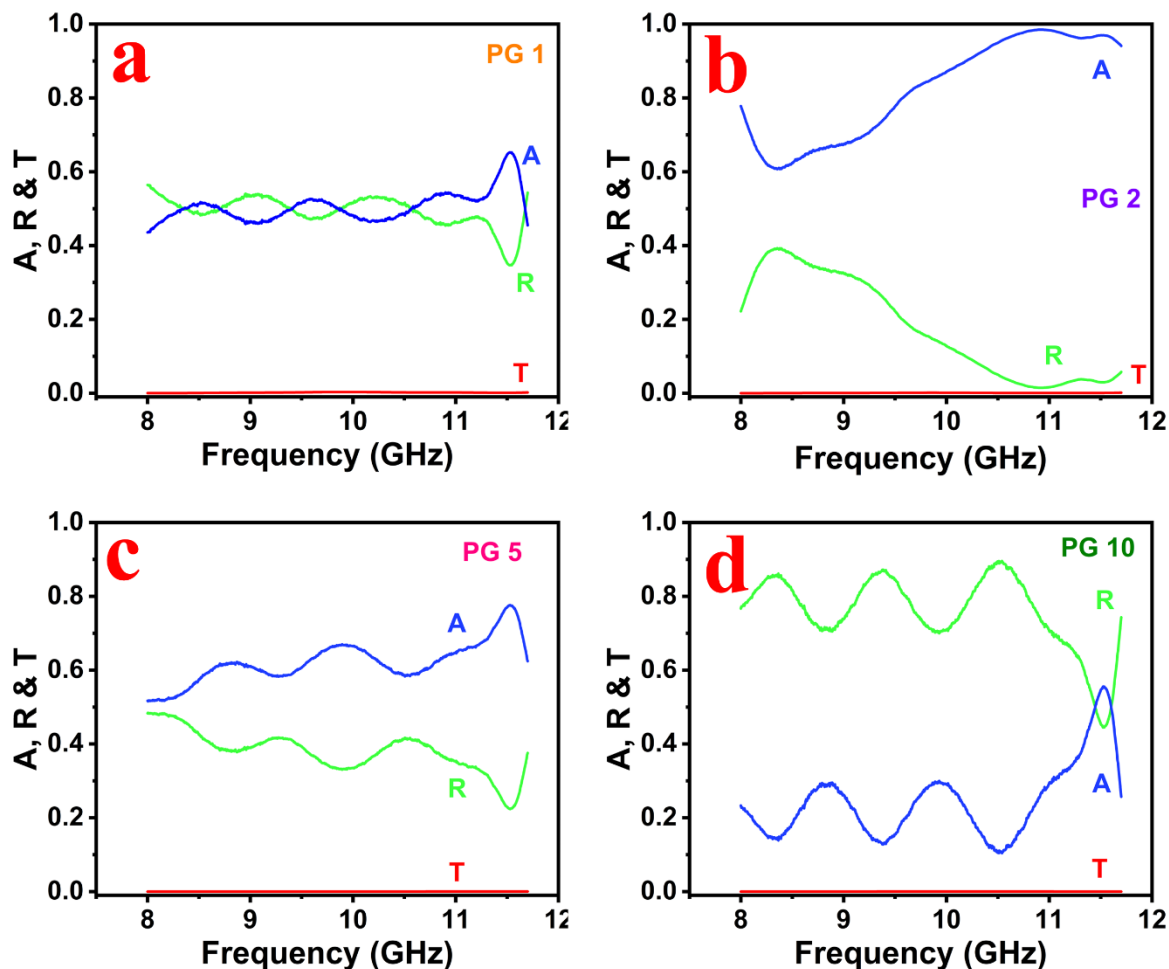

**Figure S3.** Absorption, reflection and transmission coefficients of the PANI-nanorod/graphene-nanoflake hybrid films in the X-band

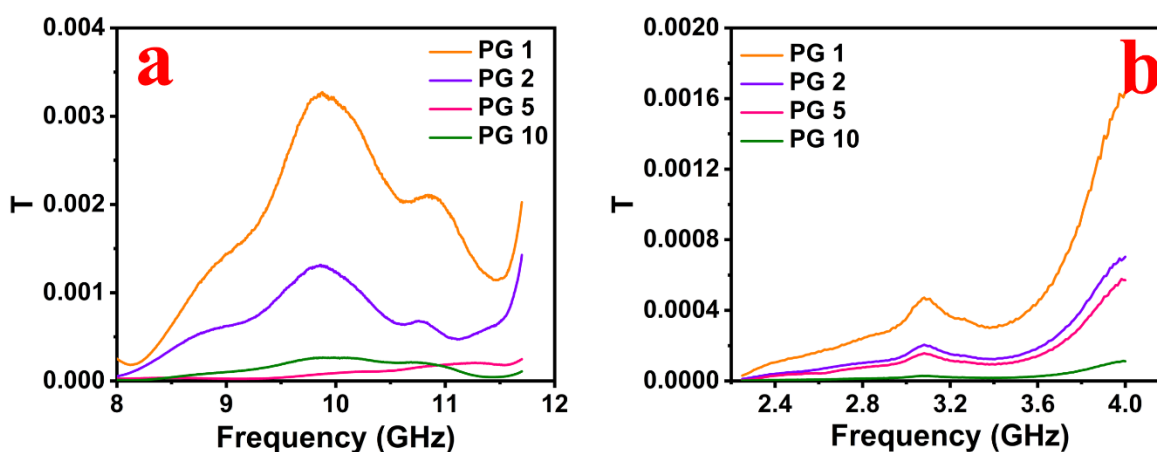

**Figure S4.** Comparison of transmission coefficients of the PANI-nanorod/graphene-nanoflake hybrid films in the S- and X-bands

### Calculation of absolute shielding effectiveness and comparison with other materials

**Table S1:** Comparison of thickness, density, mass, total shielding effectiveness and Absolute Shielding Effectiveness (A.SE) of ours with different samples reported in the literature

| Samples                                                                                                                                                             | T<br>(cm) | D<br>(g cm <sup>3</sup> ) | Mass**<br>(g) | SE <sub>Total</sub><br>(dB)       | A.SE***<br>(dB cm <sup>2</sup> g <sup>-1</sup> ) | Ref. |
|---------------------------------------------------------------------------------------------------------------------------------------------------------------------|-----------|---------------------------|---------------|-----------------------------------|--------------------------------------------------|------|
| Dense Cu foil                                                                                                                                                       | 0.0032    | 6.944                     | 0.711         | 46.3<br>(1.5 GHz-<br>10 GHz)      | 2084.38                                          | [1]  |
| TiO <sub>2</sub> /SiO <sub>2</sub> @PPy@rGO                                                                                                                         | 0.026     | 0.089                     | 0.074         | <30<br>(X-band)                   | ~13829                                           | [2]  |
| Nano CuO embedded PANI<br>films (PC 10)                                                                                                                             | 0.00102   | 3.21                      | 0.105         | 83<br>(S-band)<br>74<br>(X-band)  | 25349.70<br>22600.94                             | [3]  |
| Thermoplastic polyurethane<br>nanocomposites with Zn <sup>2+</sup> -<br>substituted CoFe <sub>2</sub> O <sub>4</sub><br>nanoparticles and Reduced<br>Graphene Oxide | 0.08      | 0.80-<br>1.17             | -             | 67.8<br>(X-band)                  | 668-963                                          | [4]  |
| GNP-Fe <sub>3</sub> O <sub>4</sub> -epoxy<br>nanocomposites (solid)                                                                                                 | 0.2       | 0.73                      | -             | 28.30<br>(X-band)                 |                                                  | [5]  |
| GNP-Fe <sub>3</sub> O <sub>4</sub> -epoxy<br>nanocomposites (porous)                                                                                                | 0.2       | 0.34                      | -             | 37.03<br>(X-band)                 |                                                  | [5]  |
| MXene graphene coated<br>fabric                                                                                                                                     | 0.35      | 0.77                      | -             | 38.99<br>(X-band)                 | 11405.3                                          | [6]  |
| MXene graphene composite                                                                                                                                            | 0.35      | 0.77                      | -             | 53.89<br>(X-band)                 | 1944.3                                           | [6]  |
| MXene graphene oxide<br>composite                                                                                                                                   | 0.35      | 0.77                      | -             | 44.10<br>(X-band)                 | 2996.2                                           | [6]  |
| Porous polyimide<br>composites containing PANI<br>modified graphene oxide<br>and MWCNT hybrid fillers                                                               | 0.2       | 0.56                      | -             | 28.2<br>(X-band)                  | 251.78                                           | [7]  |
| PG 1                                                                                                                                                                | 0.001     | 1.58                      | 0.050         | 45<br>(S-band),<br>42<br>(X-band) | 28481,<br>26582                                  | †    |
| PG 2                                                                                                                                                                | 0.001     | 1.58                      | 0.051         | 49<br>(S-band),<br>37<br>(X-band) | 31012,<br>23417                                  | †    |
| PG 5                                                                                                                                                                | 0.001     | 1.58                      | 0.052         | 53<br>(S-band),<br>46<br>(X-band) | 33544,<br>29113                                  | †    |
| PG 10                                                                                                                                                               | 0.001     | 1.58                      | 0.055         | 57<br>(S-band),<br>49<br>(X-band) | 36075,<br>31012                                  | †    |

\* $T$  = Thickness;  $D$  = density;  $SE_{Total}$  = Total Shielding Effectiveness, † **Our sample**

\*\* Mass for the volume ( $8\text{ cm} \times 4\text{ cm} \times T\text{ cm}$ )

\*\*\*The absolute shielding effectiveness of the samples were calculated using the relation [6]:

$$A. SE = \frac{SSE}{T} \text{----- (1)}$$

where,

$$\text{Specific Shielding Effectiveness, } SSE = \frac{SE_T}{D} \text{----- (2)}$$

### Magnetic Studies: M-H Curve

The magnetic studies of the hybrid films at room temperature were evaluated using Vibrating Sample Magnetometer (VSM, Quantum design, Versa lab mini PPMS with cylindrical magnet). PG10 with appreciable CuO NP loading was selected as the representative sample. The samples were placed in an out-of-plane direction (perpendicular to the direction of the magnetic field) in the sample holder. The magnetization vs magnetic field (M-H) graph shows the diamagnetic nature of the sample under test ( figure S5) [3]. As PG 10 is diamagnetic in nature, other samples may also be considered to be diamagnetic and any magnetic attributes can thus be neglected.

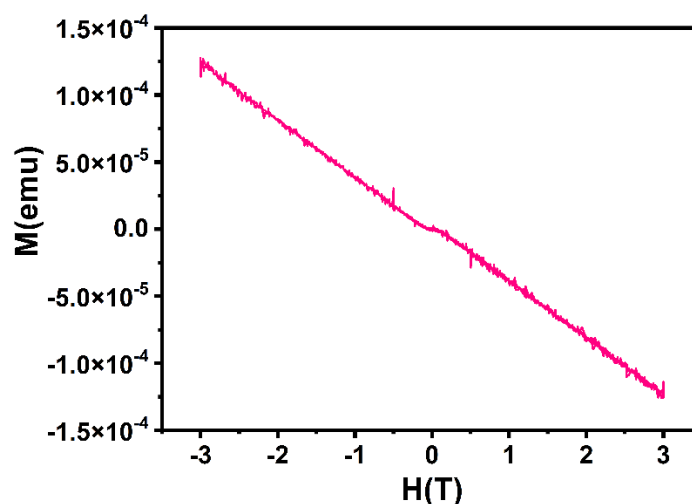

**Figure S5.** M-H curve of PANI nanorod/graphene nanoflake hybrid film

**References**

- [1] Journal of Materials Chemistry C. 2017;5(31):7853-61.
- [2] Nanoscale. 2019;11(17):8616-25.
- [3] Materials Chemistry and Physics. 2022 Oct 15; 290:126647.
- [4] ACS omega. 2021 Oct 26 ;6(42):28098-118.
- [5] Composites Science and Technology. 2019 Jan 5; 169:103-9.
- [6] Materials. 2018 Sep 22;11(10):1803.
- [7] Polymer. 2021 May 14; 224:123742.
